# Supplementary material for: Nanosphere Lithography-Enabled Hybrid Ag-Cu Surface-Enhanced Raman Spectroscopy Substrates with Enhanced Absorption of Excitation Light
Source: MDPI journal article supplement (doi:10.3390/bios13080825), 2023-08-17
Supplement: s1 [file s1]

Supplementary Material

# Nanosphere Lithography-Enabled Hybrid Ag-Cu Surface-Enhanced Raman Spectroscopy Substrates with Enhanced Absorption of Excitation Light

Zixuan Wu, Jianxun Liu\*, Zhenming Wang, Lei Chen, Yiwei Xu, Zongjun Ma, Delai Kong, Dan Luo and Yan Jun Liu \*

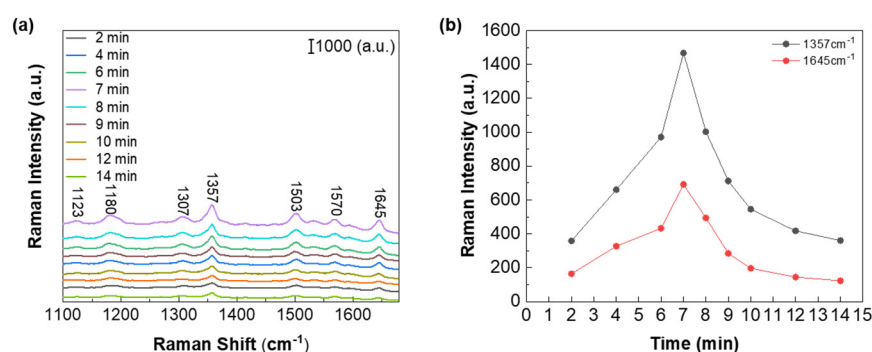

**Figure S1.** (a) Surface-enhanced Raman spectroscopy (SERS) spectra for the  $10^{-6}$  M R6G on Cu foils with the Ag nanoparticle growth reaction time of 2, 4, 6, 7, 8, 9, 10, 12, and 14 min, respectively. (b) Raman intensity of R6G at  $1357\text{ cm}^{-1}$  and  $1645\text{ cm}^{-1}$  as a function of the reaction time.

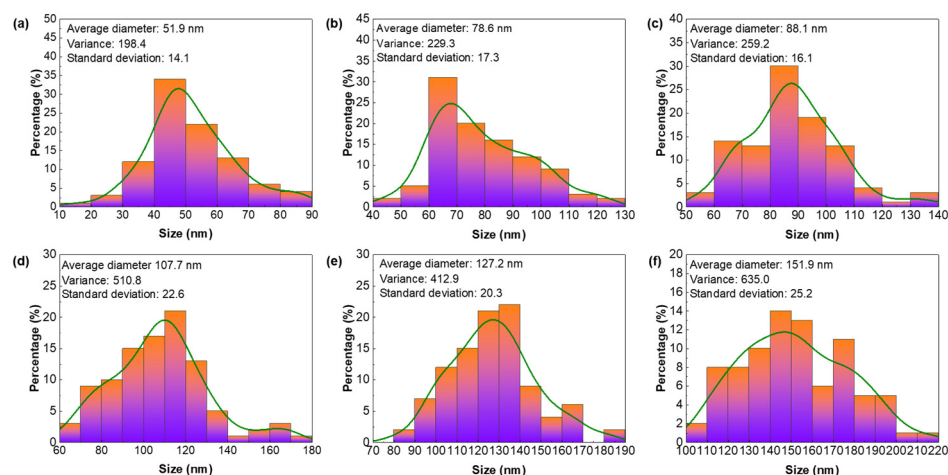

**Figure S2.** (a-f) The Ag nanoparticle size distributions of hybrid Ag-Cu SERS substrates with the reaction time of 1, 3, 5, 7, 9, and 11 min, respectively.

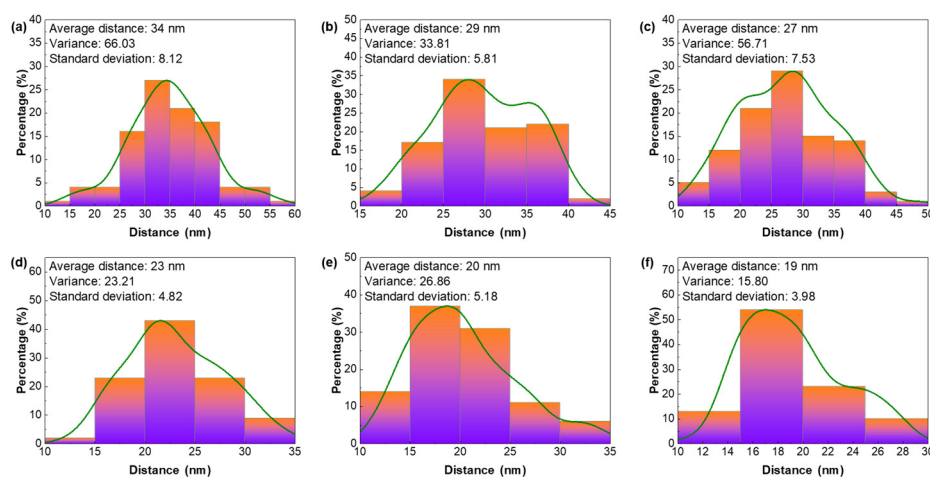

**Figure S3.** (a-f) The Ag nanoparticle distance distributions of hybrid Ag-Cu SERS substrates with the reaction time of 1, 3, 5, 7, 9, and 11 min, respectively.

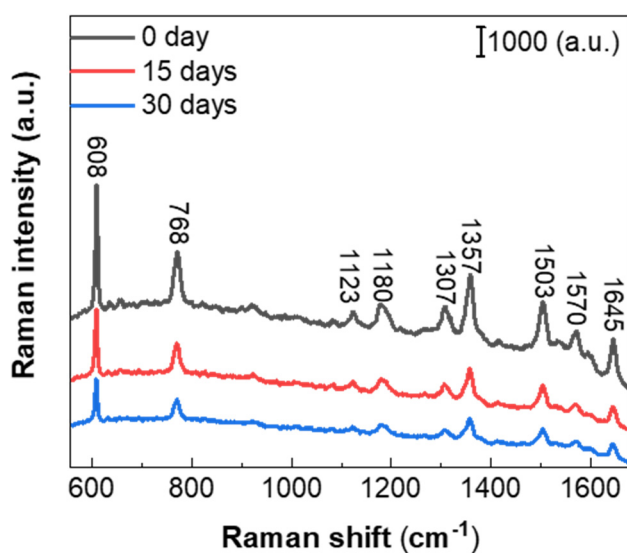

**Figure S4.** SERS spectra for the  $10^{-6}$  M R6G on the hybrid Ag-Cu substrate by exposing it for 0, 15, and 30 days.
